# Supplementary material for: Paradoxical increases in anterior cingulate cortex activity during nitrous oxide-induced analgesia reveal a signature of pain affect
Source: PubMed Central journal article supplement — bioRxiv. 2023 Apr 3:2023.04.03.534475. Preprint. [Version 1] doi: 10.1101/2023.04.03.534475 (PMC10104003; doi:10.1101/2023.04.03.534475), 2023-04-03
Supplement: media-1.pdf [file media-1.pdf]

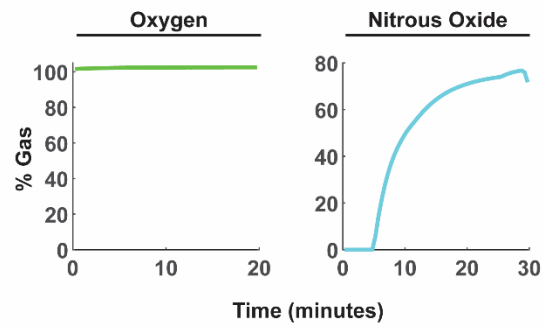

**Supplemental Fig. 1. Oxygen and nitrous oxide concentrations during recordings of spontaneous ACC activity (See Figures 1 and 2).** Gas concentrations averaged across all mice in figures 1 and 2 (mean  $\pm$  SEM; N = 30 mice).

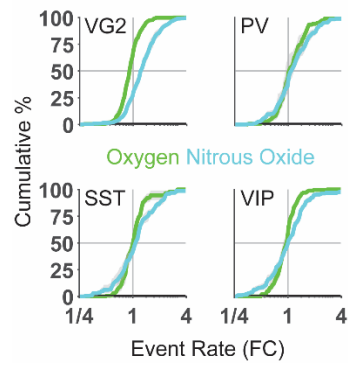

**Supplemental Fig. 2. Nitrous oxide differentially influences molecularly distinct subpopulations of ACC neurons.** Fold change in event rate quantified as cumulative percent (mean  $\pm$  SEM) for distinct populations of ACC neurons (neurons expressing vGluT2 (VG2), parvalbumin (PV), somatostatin (SST), or vasoactive intestinal peptide (VIP)). N = 6 mice per genotype.

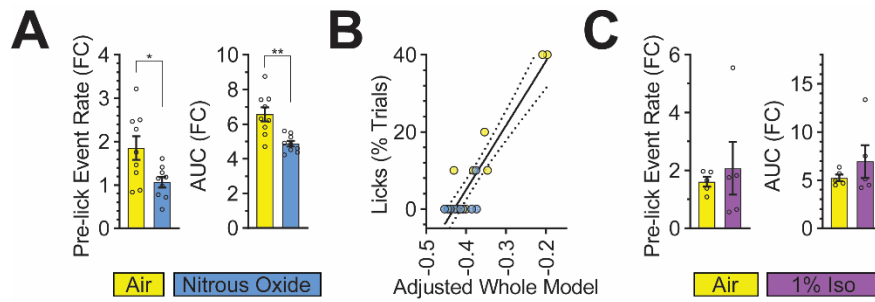

**Supplemental Fig. 3. ACC neural activity correlates with production of noxious stimulus-evoked affective-motivational behaviors.** (A) Nitrous oxide-induced changes to event rate post laser and prior to licking; area under the curve (AUC) quantified from **Fig. 4H** (paired t-test,  $n = 9$ ). (B) Stepwise linear regression with interaction effects of the Adjusted Whole Model (pre-lick event rate (FC), maximum event rate (FC), AUC (FC), and percentage of laser responsive neurons vs percentage of licks; adjusted  $R^2 = 0.736$ ,  $p < 0.004$ ). (C) Isoflurane-induced changes to event rate prior to licking and AUC quantified from **Fig. 5F** (paired t-test,  $n = 5$ ).
